# Supplementary material for: Preparation and Characterization of a Novel Salicin–Cyclodextrin Complex
Source: MDPI journal article supplement (doi:10.3390/pharmaceutics16030369), 2024-03-06
Supplement: s1 [file s1]

*File S1: The xyz coordinates of the three optimized structures of salicin.*

**xyz coordinates of salicin (gas)**

|   |             |             |             |
|---|-------------|-------------|-------------|
| O | 0.63341206  | 0.44755225  | -0.61642907 |
| O | -0.78611203 | -1.35403160 | -0.46576106 |
| O | 3.97547676  | -1.81188224 | 0.13644241  |
| O | 4.16621880  | 1.11287896  | 0.38840547  |
| O | 1.36282464  | -2.89426962 | 0.72533374  |
| O | 0.54425167  | 3.38862798  | -0.53371461 |
| O | -1.60925721 | 1.41189114  | -1.96007696 |
| C | 2.84727084  | -0.95742346 | 0.42658424  |
| C | 3.01812114  | 0.44356794  | -0.19896449 |
| C | 1.58440133  | -1.70452924 | -0.05593318 |
| C | 1.71036408  | 1.25565456  | -0.06415625 |
| C | 0.36761129  | -0.78233473 | 0.11258881  |
| C | 1.69921688  | 2.58704718  | -0.83057755 |
| C | -2.01820553 | -0.99976502 | 0.14248906  |
| C | -2.92482302 | -0.18353842 | -0.56346574 |
| C | -2.32526814 | -1.52533390 | 1.40233924  |
| C | -4.15176965 | 0.10622632  | 0.06036188  |
| C | -2.61287750 | 0.36101873  | -1.95028219 |
| C | -3.55363526 | -1.21646939 | 2.00031689  |
| C | -4.46905196 | -0.39663265 | 1.32830355  |
| H | 2.75576230  | -0.83360725 | 1.52360035  |
| H | 3.27235379  | 0.33503049  | -1.26139523 |
| H | 1.68586815  | -1.95013128 | -1.12534404 |
| H | 1.49725082  | 1.45997122  | 1.00190907  |
| H | 0.19529189  | -0.54570462 | 1.17548325  |
| H | 1.78069462  | 2.38000508  | -1.91045636 |
| H | 2.57257890  | 3.17522730  | -0.52761858 |
| H | 4.78017712  | -1.30517657 | 0.36797048  |
| H | 3.95757766  | 1.30893767  | 1.32453191  |
| H | 2.19675005  | -3.40459560 | 0.69683597  |
| H | -0.24658636 | 2.96629040  | -0.93105921 |
| H | -1.61052824 | -2.18460682 | 1.89244438  |
| H | -4.86714688 | 0.74069467  | -0.46334275 |
| H | -2.29323672 | -0.45921890 | -2.61149564 |
| H | -3.51889288 | 0.80810186  | -2.37377733 |
| H | -3.79523734 | -1.62560743 | 2.98037555  |
| H | -5.42670787 | -0.15305921 | 1.78632814  |
| H | -0.78397117 | 0.99820021  | -1.61981764 |

**xyz coordinates of salicin (aq)**

|   |             |             |             |
|---|-------------|-------------|-------------|
| O | 0.58928407  | 0.46180314  | -0.52617793 |
| O | -0.78347643 | -1.38942450 | -0.39352983 |
| O | 3.99723854  | -1.80260552 | -0.02497822 |
| O | 4.14446204  | 1.13413086  | 0.41336987  |
| O | 1.42025832  | -2.95464931 | 0.56532555  |
| O | 0.48980737  | 3.38917686  | -0.36367705 |
| O | -1.61210601 | 1.24259798  | -2.11195485 |
| C | 2.87402288  | -0.97562076 | 0.37071569  |
| C | 3.00490609  | 0.46323079  | -0.18136651 |
| C | 1.60273170  | -1.69581502 | -0.12322013 |
| C | 1.68835553  | 1.25128310  | 0.03212510  |
| C | 0.38555464  | -0.80427970 | 0.15678682  |
| C | 1.66885802  | 2.60448402  | -0.68387324 |
| C | -2.01228713 | -0.97487228 | 0.18799832  |
| C | -2.92053544 | -0.24762290 | -0.60625820 |
| C | -2.31632279 | -1.34957830 | 1.50071384  |
| C | -4.15469380 | 0.10287954  | -0.02769312 |
| C | -2.59000150 | 0.15205627  | -2.03306983 |
| C | -3.54887818 | -0.97954197 | 2.05582327  |
| C | -4.47076293 | -0.25191146 | 1.29036829  |
| H | 2.83178989  | -0.92466412 | 1.47134144  |
| H | 3.22884378  | 0.41565043  | -1.25448931 |
| H | 1.66876096  | -1.86126136 | -1.20975604 |
| H | 1.50688598  | 1.40077524  | 1.10886349  |
| H | 0.26072763  | -0.61838028 | 1.23371725  |
| H | 1.74626647  | 2.45026490  | -1.76992019 |
| H | 2.52780573  | 3.19459175  | -0.35207714 |
| H | 4.78804289  | -1.45765521 | 0.43722830  |
| H | 3.99379674  | 1.19685289  | 1.37993405  |
| H | 2.26783024  | -3.43947841 | 0.48373826  |
| H | -0.28612327 | 2.95362056  | -0.77269832 |
| H | -1.59991269 | -1.93187228 | 2.07766763  |
| H | -4.87289210 | 0.66426613  | -0.62519295 |
| H | -2.21356805 | -0.71072796 | -2.59929722 |
| H | -3.49128220 | 0.52552204  | -2.52777843 |
| H | -3.78753268 | -1.26940122 | 3.07809081  |
| H | -5.43140692 | 0.03431858  | 1.71593098  |
| H | -0.80125318 | 0.91790252  | -1.65323652 |

**xyz coordinates of salicin (EtOH)**

|   |             |             |             |
|---|-------------|-------------|-------------|
| O | 0.59608261  | 0.45887941  | -0.53423646 |
| O | -0.76899135 | -1.39426828 | -0.39786182 |
| O | 4.00844019  | -1.76947861 | 0.09408346  |
| O | 4.13778142  | 1.16815007  | 0.42608008  |
| O | 1.42585488  | -2.92791893 | 0.64407050  |
| O | 0.46558704  | 3.37949231  | -0.44264937 |
| O | -1.59206477 | 1.23449890  | -2.12675815 |
| C | 2.86953407  | -0.94115959 | 0.43432089  |
| C | 3.00382140  | 0.48019193  | -0.15895129 |
| C | 1.61499043  | -1.68446628 | -0.06908570 |
| C | 1.68256698  | 1.26711517  | 0.02038122  |
| C | 0.38576207  | -0.79589196 | 0.16672450  |
| C | 1.65973453  | 2.60461884  | -0.72452595 |
| C | -2.00935695 | -0.99070178 | 0.16688278  |
| C | -2.91200826 | -0.26323341 | -0.63383437 |
| C | -2.32851090 | -1.37846321 | 1.47247619  |
| C | -4.15640191 | 0.07255638  | -0.06789582 |
| C | -2.57079236 | 0.14600612  | -2.05609688 |
| C | -3.57115206 | -1.02332666 | 2.01435067  |
| C | -4.48733238 | -0.29482791 | 1.24301292  |
| H | 2.79851585  | -0.85585630 | 1.53193400  |
| H | 3.23701629  | 0.40190495  | -1.22829257 |
| H | 1.70445654  | -1.87343227 | -1.15039660 |
| H | 1.48676173  | 1.43930221  | 1.09152100  |
| H | 0.23669867  | -0.59333335 | 1.23819078  |
| H | 1.75939552  | 2.42826182  | -1.80564127 |
| H | 2.50547655  | 3.21239713  | -0.39013228 |
| H | 4.79504964  | -1.36221313 | 0.51137833  |
| H | 3.97320195  | 1.26997800  | 1.38712837  |
| H | 2.27273061  | -3.41621938 | 0.57942438  |
| H | -0.29976034 | 2.91856001  | -0.84459969 |
| H | -1.61532157 | -1.96230241 | 2.05188602  |
| H | -4.87208568 | 0.63301046  | -0.66949654 |
| H | -2.19391162 | -0.71537658 | -2.62471790 |
| H | -3.46903284 | 0.52237758  | -2.55452646 |
| H | -3.82205806 | -1.32527927 | 3.03018483  |
| H | -5.45615998 | -0.02001359 | 1.65740374  |
| H | -0.77792291 | 0.90049954  | -1.68204201 |
